# Supplementary material
Source: Springer Nature journal article supplement (https://www.springermedizin.de/resource/supplementary/12889_2007_1249_MOESM2_ESM.pdf/9502782)

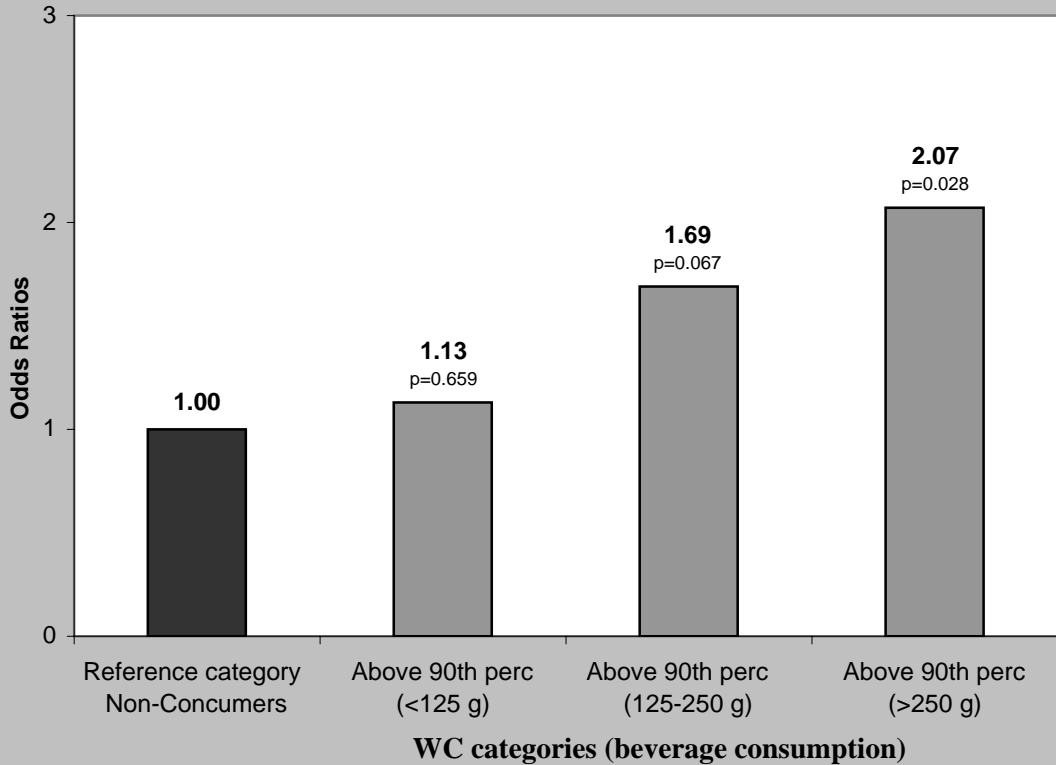

Supplement: MOESM2 [file 9502782]
